# Supplementary material
Source: PubMed Central journal article supplement (PMC5661977)
Supplement: NIHMS688944-supplement-supplement_1.pdf [file NIHMS688944-supplement-supplement_1.pdf]

**Supplemental Table 1:** Comprehensive histologic assessment on cryostat slides from frozen tumor specimens.

| Case | Presentation (interval)                                        | Tumor | Location | Type    | Subtype |           |     |       |                | Comparison                              |
|------|----------------------------------------------------------------|-------|----------|---------|---------|-----------|-----|-------|----------------|-----------------------------------------|
|      |                                                                |       |          |         | Acinar  | Papillary | BAC | Solid | Micropapillary |                                         |
| 1    | synchronous                                                    | A     | LLL      | ADC     | 0%      | 40%       | 60% | 0%    | 0%             | different                               |
|      |                                                                | B     | RLL      | ADC     | 40%     | 60%       | 0%  | 0%    | 0%             |                                         |
| 2    | synchronous                                                    | A     | LLL      | ADC     | 70%     | 20%       | 10% | 0%    | 0%             | similar                                 |
|      |                                                                | B     | RUL      | ADC     | 70%     | 10%       | 20% | 0%    | 0%             |                                         |
| 3    | synchronous                                                    | A     | RUL      | ADC     | 60%     | 0%        | 0%  | 0%    | 40%            | different                               |
|      |                                                                | B     | LUL      | ADC     | 30%     | 70%       | 0%  | 0%    | 0%             |                                         |
| 4    | synchronous                                                    | A     | RLL      | ADC     | 0%      | 50%       | 30% | 0%    | 20%            | similar                                 |
|      |                                                                | B     | LUL      | ADC     | 10%     | 30%       | 40% | 0%    | 20%            |                                         |
| 5    | synchronous                                                    | A     | LLL      | ADC     | 80%     | 20%       | 0%  | 0%    | 0%             | different*<br>different#<br>different ^ |
|      |                                                                | B     | LUL      | LCNEC   | n/a     | n/a       | n/a | n/a   | n/a            |                                         |
|      |                                                                | C     | RUL      | ADC     | 40%     | 0%        | 0%  | 60%   | 0%             |                                         |
| 6    | synchronous                                                    | A     | RUL      | ADC     | 30%     | 70%       | 0%  | 0%    | 0%             | similar                                 |
|      |                                                                | B     | LLL      | ADC     | 30%     | 70%       | 0%  | 0%    | 0%             |                                         |
| 7    | metachronous (14.1 months)                                     | A     | LLL      | ADC     | 0%      | 100%      | 0%  | 0%    | 0%             | similar                                 |
|      |                                                                | B     | RML      | ADC     | 0%      | 100%      | 0%  | 0%    | 0%             |                                         |
| 8    | metachronous (51.1 months)                                     | A     | LUL      | ADC     | 40%     | 60%       | 0%  | 0%    | 0%             | different                               |
|      |                                                                | B     | RUL      | ADC     | 0%      | 0%        | 0%  | 100%  | 0%             |                                         |
| 9    | metachronous (41.2 months)                                     | A     | RLL      | ADC     | 10%     | 70%       | 0%  | 0%    | 20%            | similar                                 |
|      |                                                                | B     | RUL      | ADC     | 10%     | 80%       | 0%  | 0%    | 10%            |                                         |
| 10   | metachronous (25.1 months)                                     | A     | LUL      | SCC     | n/a     | n/a       | n/a | n/a   | n/a            | n/a                                     |
|      |                                                                | B     | RLL      | SCC     | n/a     | n/a       | n/a | n/a   | n/a            |                                         |
| 11   | metachronous (42.7 months)                                     | A     | LUL      | ADC     | 30%     | 0%        | 0%  | 70%   | 0%             | different                               |
|      |                                                                | B     | RLL      | ADC     | 60%     | 40%       | 0%  | 0%    | 0%             |                                         |
| 12   | metachronous (23.0 months)                                     | A     | RUL      | ADC     | 60%     | 40%       | 0%  | 0%    | 0%             | similar                                 |
|      |                                                                | B     | LUL      | ADC     | 60%     | 40%       | 0%  | 0%    | 0%             |                                         |
| 13   | metachronous (18.9 months)                                     | A     | RLL      | ADC     | 0%      | 70%       | 30% | 0%    | 0%             | similar                                 |
|      |                                                                | B     | RUL      | ADC     | 10%     | 80%       | 10% | 0%    | 0%             |                                         |
| 14   | metachronous (18.6 months)                                     | A     | RUL      | ADC     | 90%     | 0%        | 10% | 0%    | 0%             | different                               |
|      |                                                                | B     | LUL      | ADC     | 90%     | 0%        | 0%  | 10%   | 0%             |                                         |
| 15   | metachronous (50.2 months)                                     | A     | LUL      | SCC     | n/a     | n/a       | n/a | n/a   | n/a            | n/a                                     |
|      |                                                                | B     | RUL      | SCC     | n/a     | n/a       | n/a | n/a   | n/a            |                                         |
| 16   | metachronous (53.6 months)                                     | A     | LLL      | SCC     | n/a     | n/a       | n/a | n/a   | n/a            | different                               |
|      |                                                                | B     | LUL      | ADC/SCC | 60%     | 40%       | 0%  | 0%    | 0%             |                                         |
| 17   | metachronous (33.3 months)                                     | A     | LUL      | SCC     | n/a     | n/a       | n/a | n/a   | n/a            | different                               |
|      |                                                                | B     | RUL      | ADC     | 70%     | 30%       | 0%  | 0%    | 0%             |                                         |
| 18   | metachronous (72.2 months)                                     | A     | LUL      | ADC     | 0%      | 10%       | 90% | 0%    | 0%             | different                               |
|      |                                                                | B     | RLL      | ADC     | 100%    | 0%        | 0%  | 0%    | 0%             |                                         |
| 19   | metachronous (13.5 months)                                     | A     | LLL      | ADC/SCC | 10%     | 0%        | 0%  | 90%   | 0%             | different                               |
|      |                                                                | B     | LLL      | ADC     | 60%     | 0%        | 0%  | 40%   | 0%             |                                         |
| 20   | metachronous (6.6 months*)<br>(11.5 months#)<br>(18.1 months^) | A     | LLL      | ADC     | 0%      | 30%       | 0%  | 70%   | 0%             | similar*<br>similar#<br>similar ^       |
|      |                                                                | B     | LUL      | ADC     | 0%      | 40%       | 0%  | 60%   | 0%             |                                         |
|      |                                                                | C     | LUL      | ADC     | 0%      | 20%       | 0%  | 80%   | 0%             |                                         |

ADC: adenocarcinoma; SCC: squamous cell carcinoma; ADC/SCC: adenosquamous carcinoma; LCNEC: large-cell neuroendocrine carcinoma; BAC: bronchiolo-alveolar carcinoma; n/a: not applicable; \* tumor A vs. tumor B; # tumor B vs. tumor C; ^ tumor A vs. tumor C
